# Supplementary material for: A new enantioselective synthesis of antiobesity drug lorcaserin
Source: Royal Society of Chemistry journal article supplement (doi:10.1039/c9nj04234b), 2019-01-01
Supplement: c9nj04234b1.pdf [file c9nj04234b1.pdf]

## Supplementary Material

### A new enantioselective synthesis of antiobesity drug lorcaserin

Ganesh S. Ghotekar,<sup>a,b</sup> Devidas A. More,<sup>a,b</sup> Viswanadh Nalla<sup>a,b</sup> and M. Muthukrishnan\*<sup>a,b</sup>

<sup>a</sup>Division of Organic Chemistry, CSIR-National Chemical Laboratory, Pune 411008, India

<sup>b</sup>Academy of Scientific and Innovative Research (AcSIR), Ghaziabad, 201002, India

E-mail: m.muthukrishnan@ncl.res.in

| <u>Sr.No</u> | <u>Table of Contents</u>                                         | <u>Pages</u> |
|--------------|------------------------------------------------------------------|--------------|
| 1            | <sup>1</sup> H & <sup>13</sup> C NMR of compound ( <i>R</i> )-3a | S2           |
| 2            | <sup>1</sup> H & <sup>13</sup> C NMR of compound ( <i>R</i> )-4  | S3           |
| 3            | <sup>1</sup> H & <sup>13</sup> C NMR of compound ( <i>R</i> )-5a | S4           |
| 4            | <sup>1</sup> H & <sup>13</sup> C NMR of compound ( <i>R</i> )-5b | S5           |
| 5            | <sup>1</sup> H & <sup>13</sup> C NMR of compound ( <i>R</i> )-6a | S6           |
| 6            | <sup>1</sup> H & <sup>13</sup> C NMR of compound ( <i>R</i> )-6b | S7           |
| 7            | <sup>1</sup> H & <sup>13</sup> C NMR of compound ( <i>R</i> )-7b | S8           |
| 8            | <sup>1</sup> H & <sup>13</sup> C NMR of compound ( <i>R</i> )-1a | S9           |
| 9            | <sup>1</sup> H & <sup>13</sup> C NMR of compound ( <i>R</i> )-1  | S10          |
| 10           | Chiral HPLC analysis of ( <i>R</i> )-Lorcaserin ( <i>R</i> )-1   | S11          |

---

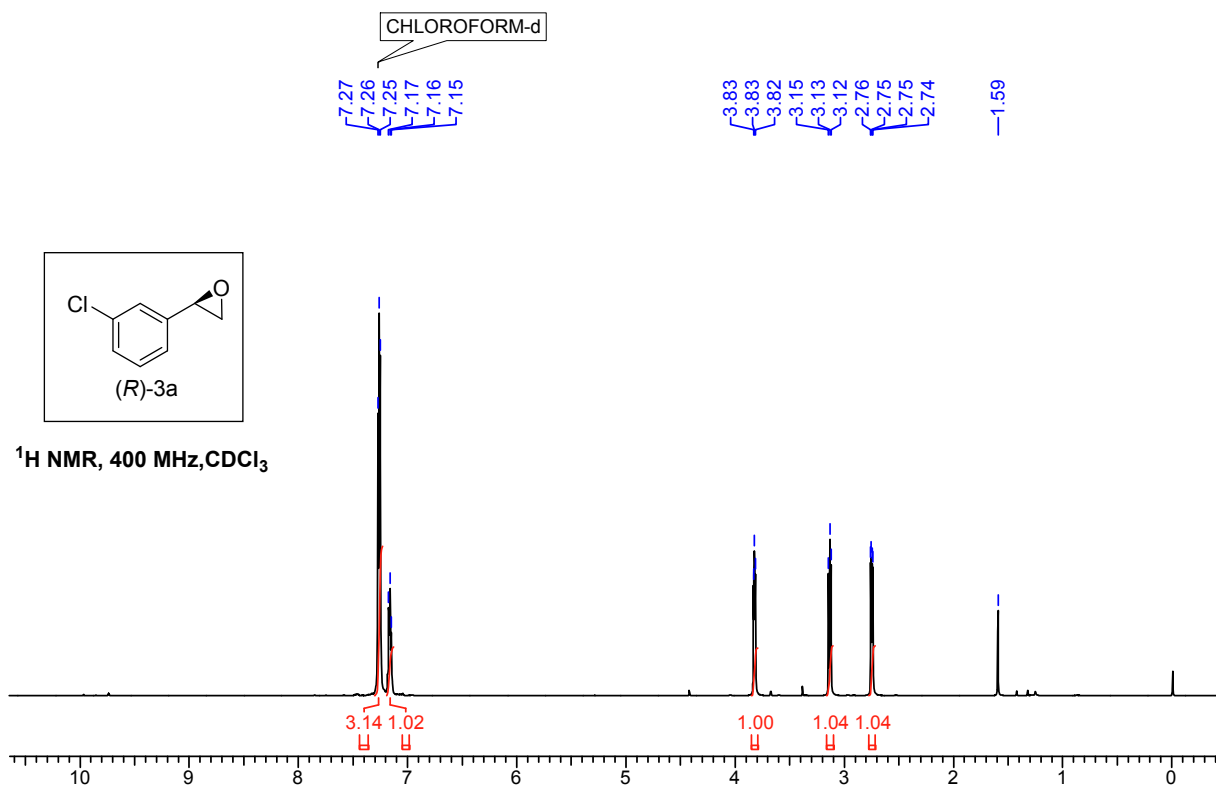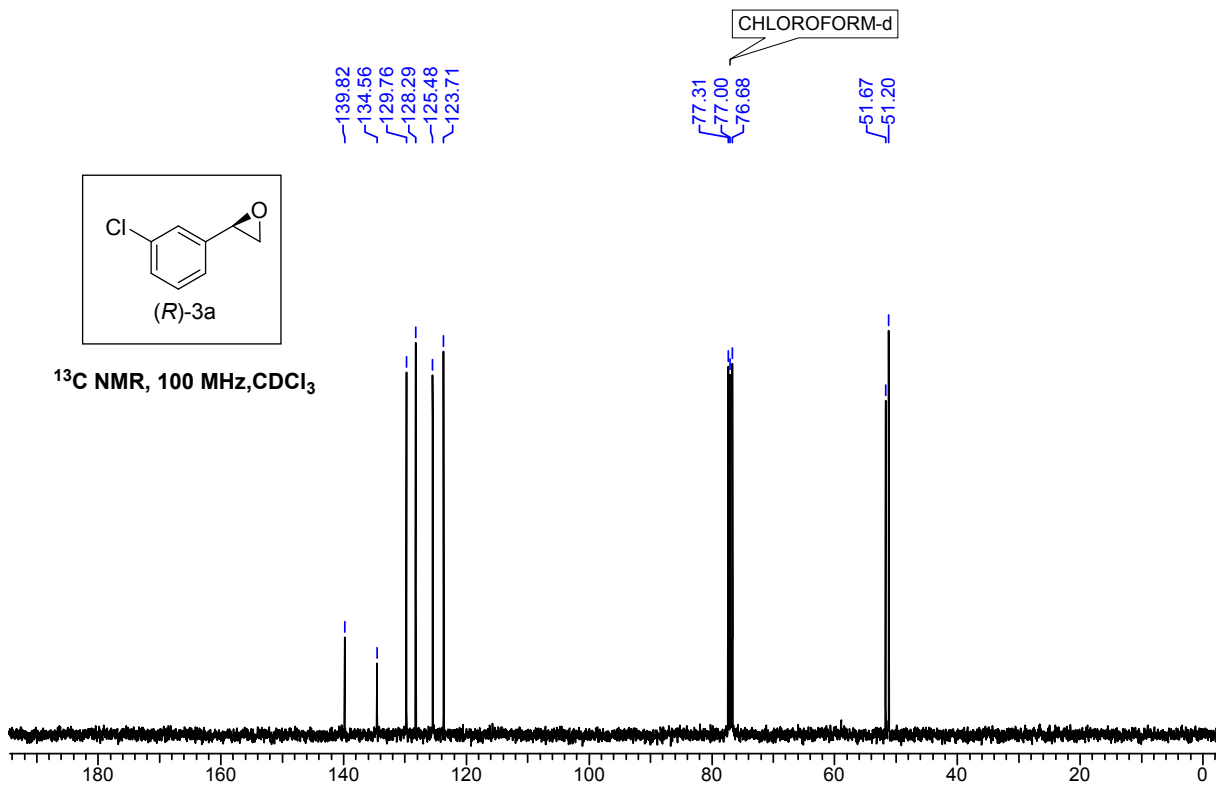

**<sup>1</sup>H NMR & <sup>13</sup>C NMR of Compound (R)-3a in CDCl<sub>3</sub>**

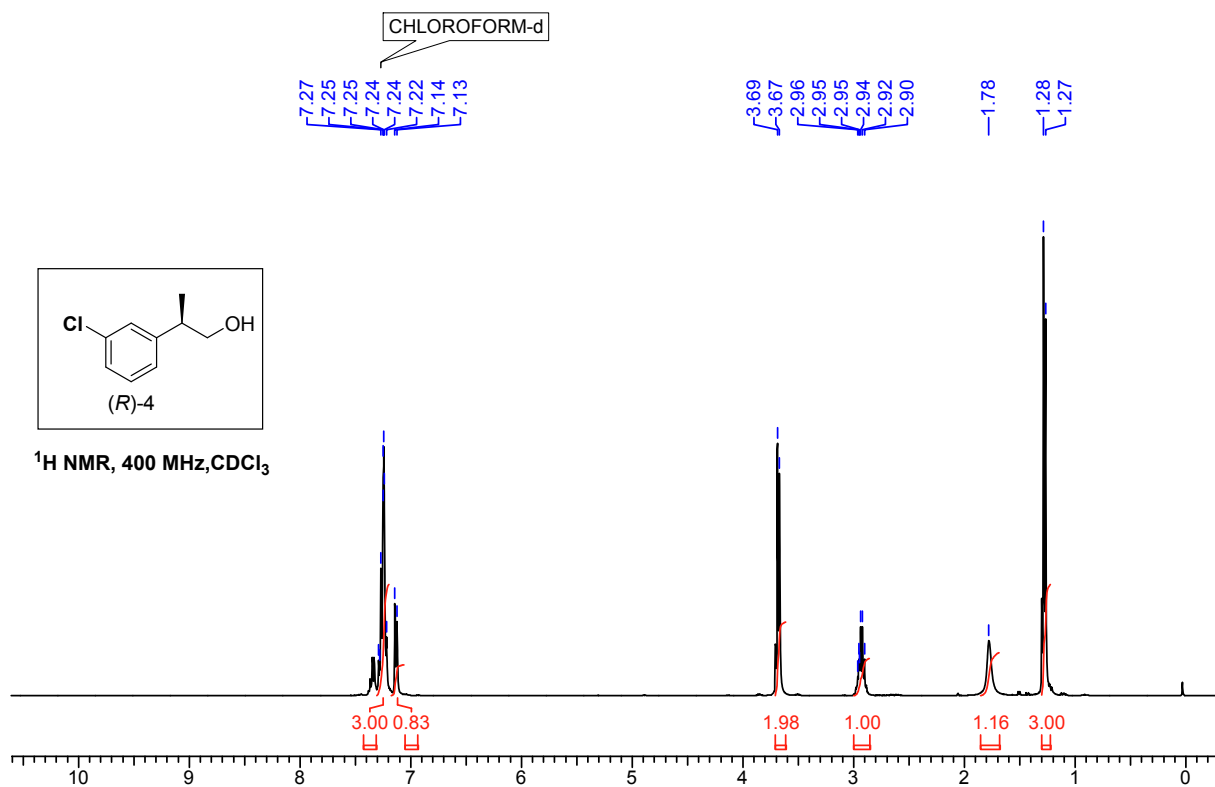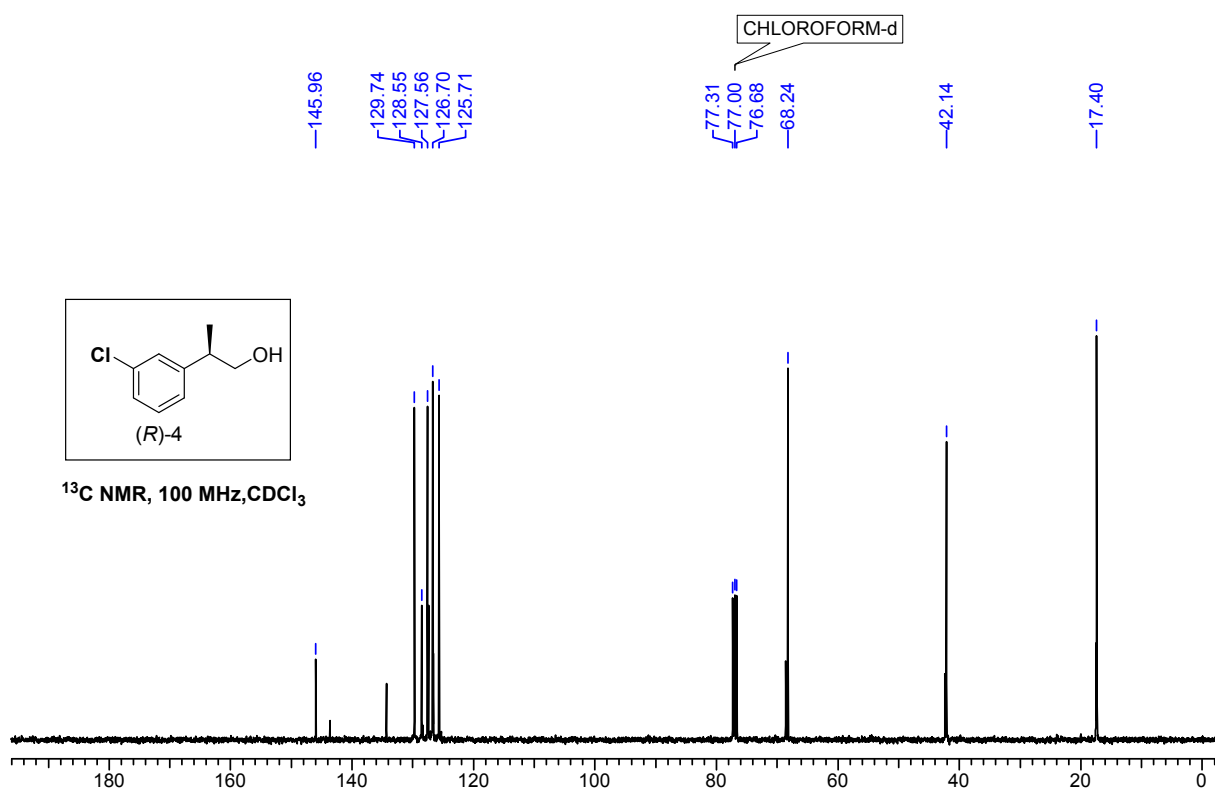

**<sup>1</sup>H NMR & <sup>13</sup>C NMR of Compound (R)-4 in CDCl<sub>3</sub>**

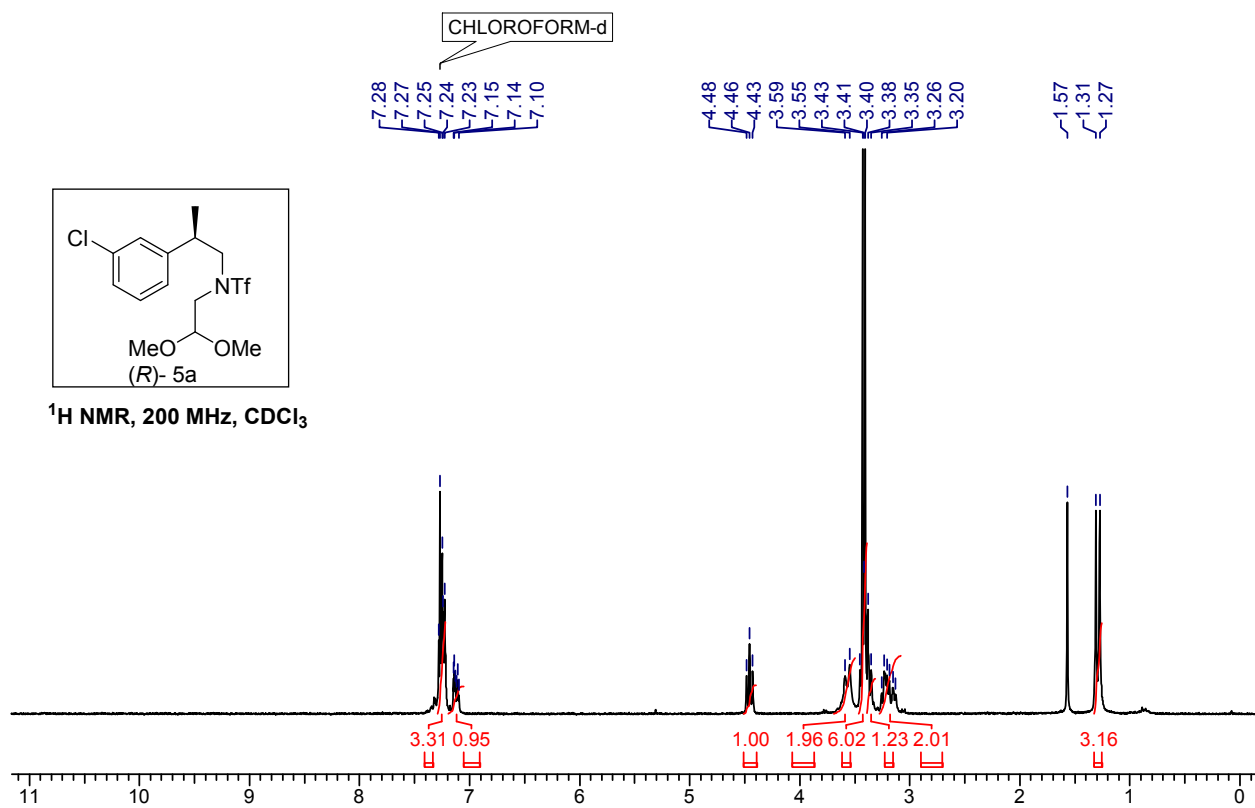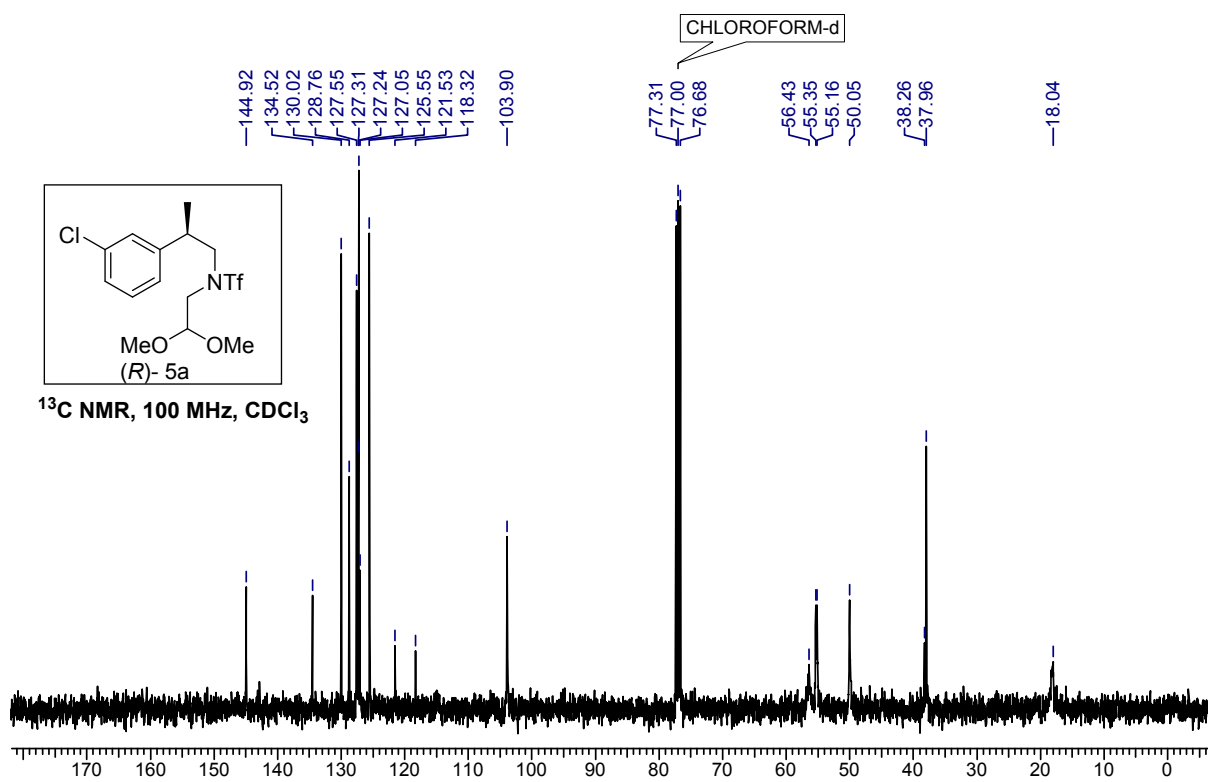

# <sup>1</sup>H NMR & <sup>13</sup>C NMR of Compound (R)-5a in CDCl<sub>3</sub>

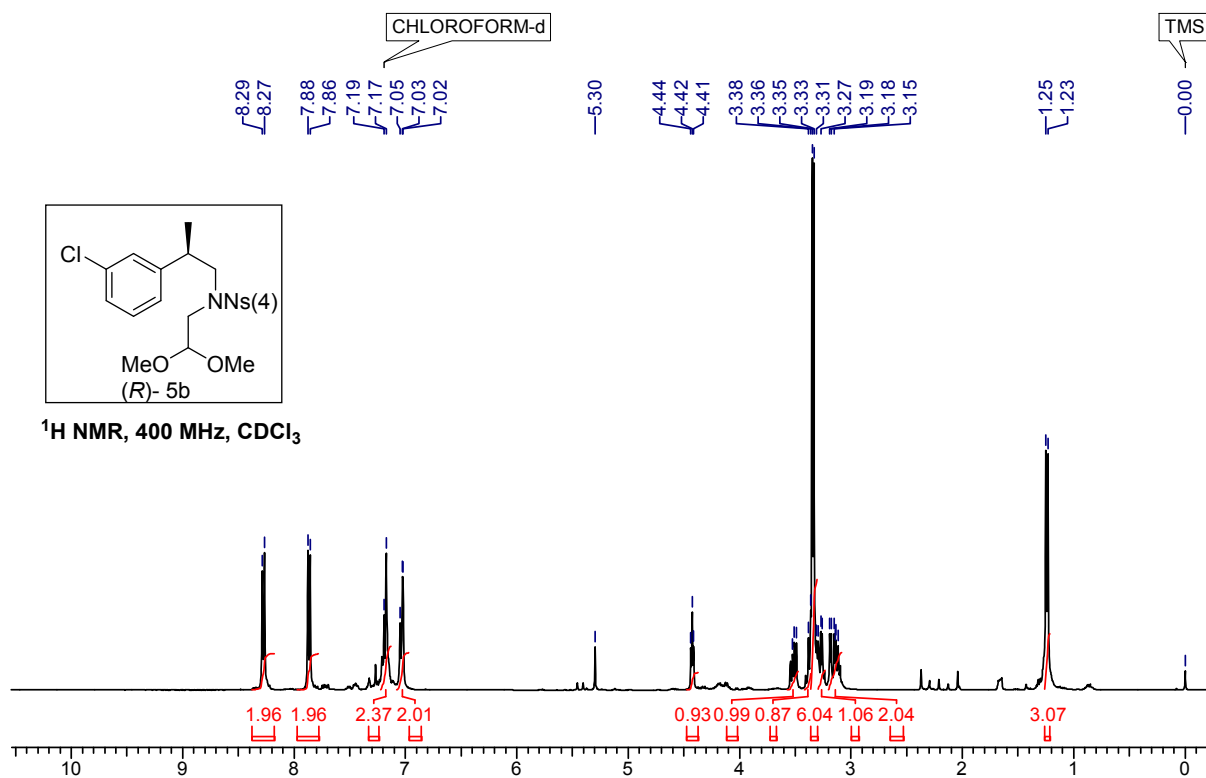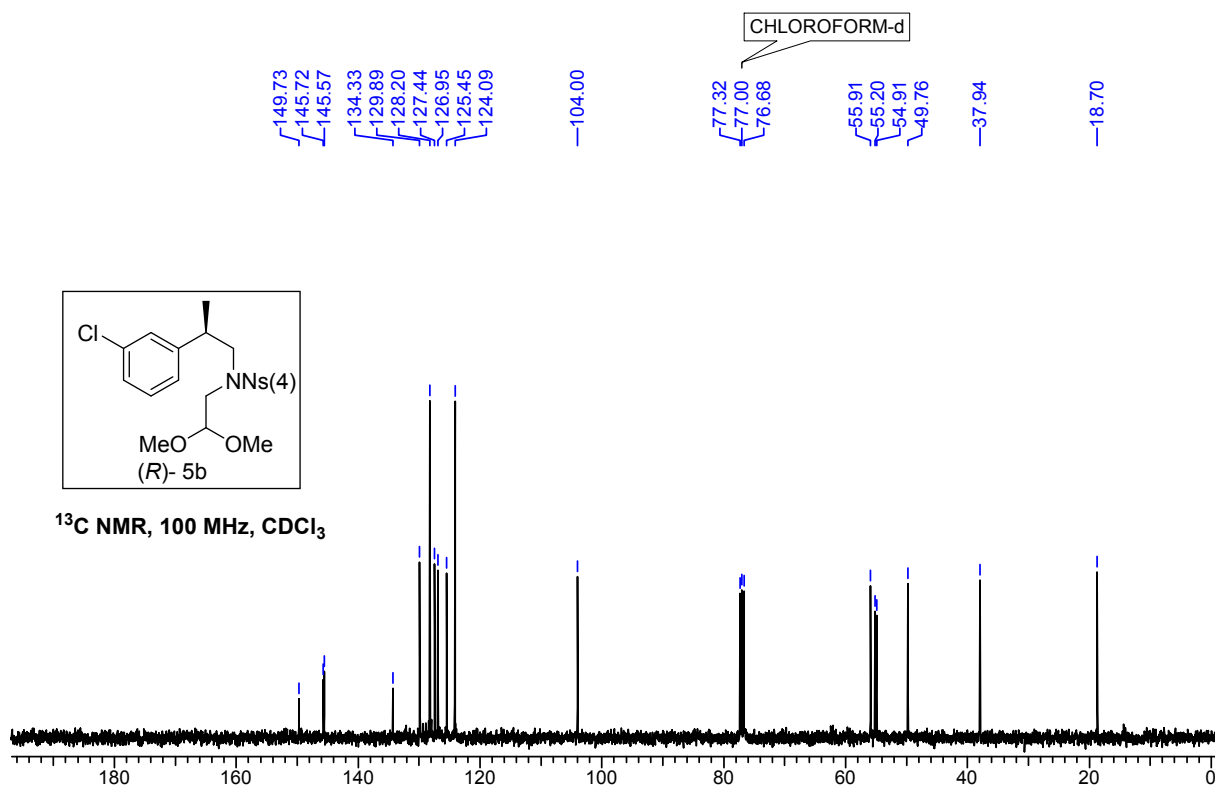

# <sup>1</sup>H NMR & <sup>13</sup>C NMR of Compound (R)-5b in CDCl<sub>3</sub>

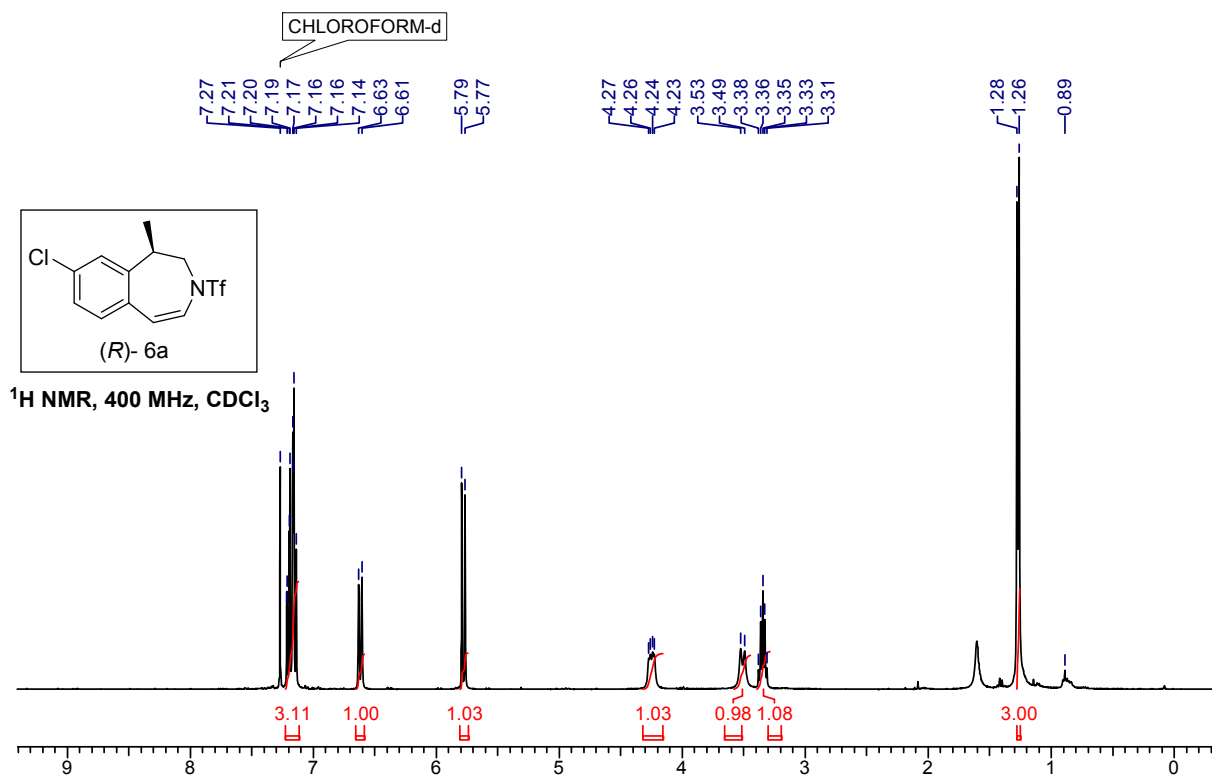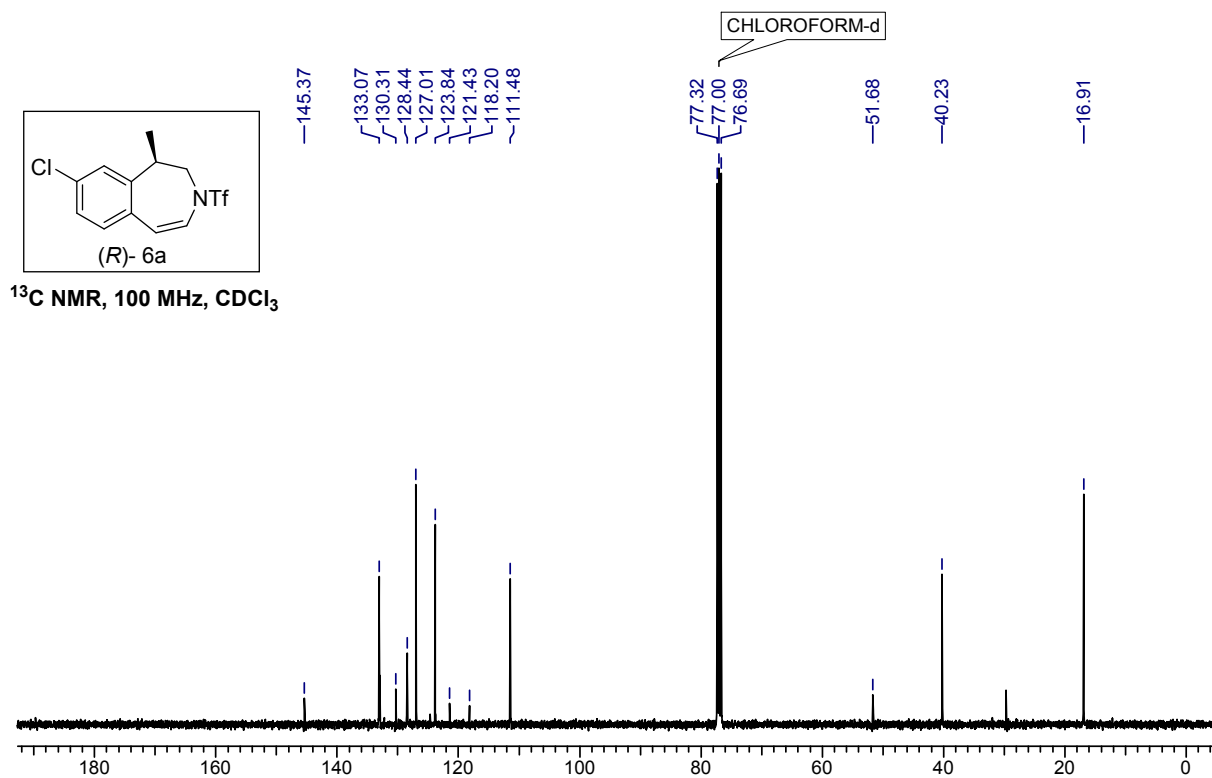

**<sup>1</sup>H NMR & <sup>13</sup>C NMR of Compound (R)-6a in CDCl<sub>3</sub>**

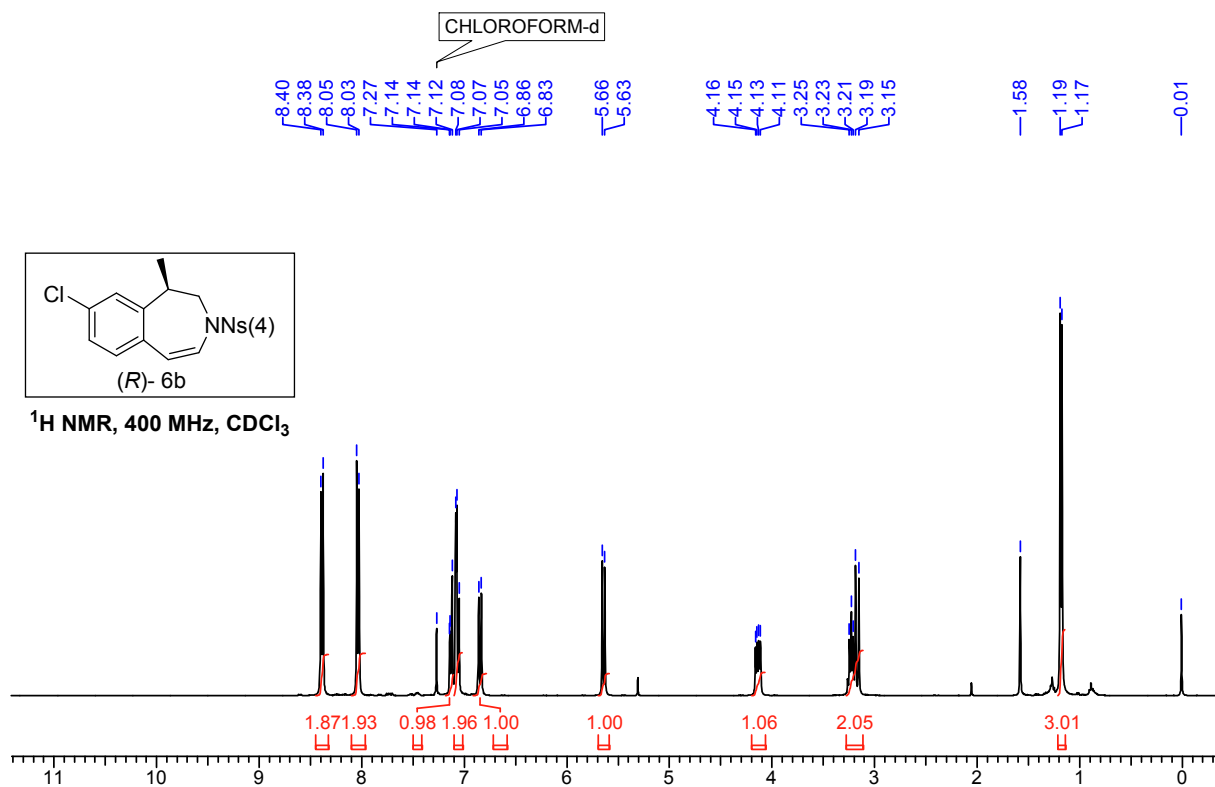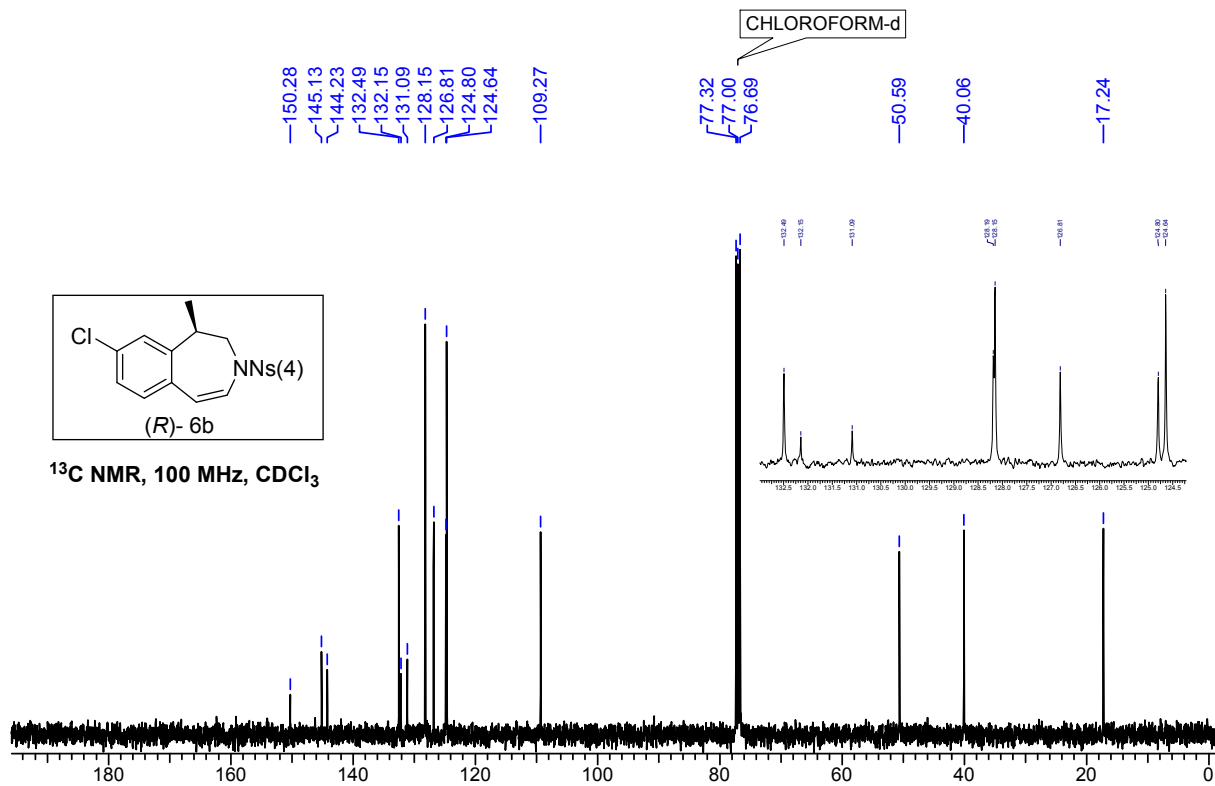

<sup>1</sup>H NMR & <sup>13</sup>C NMR of Compound (R)-6b in CDCl<sub>3</sub>

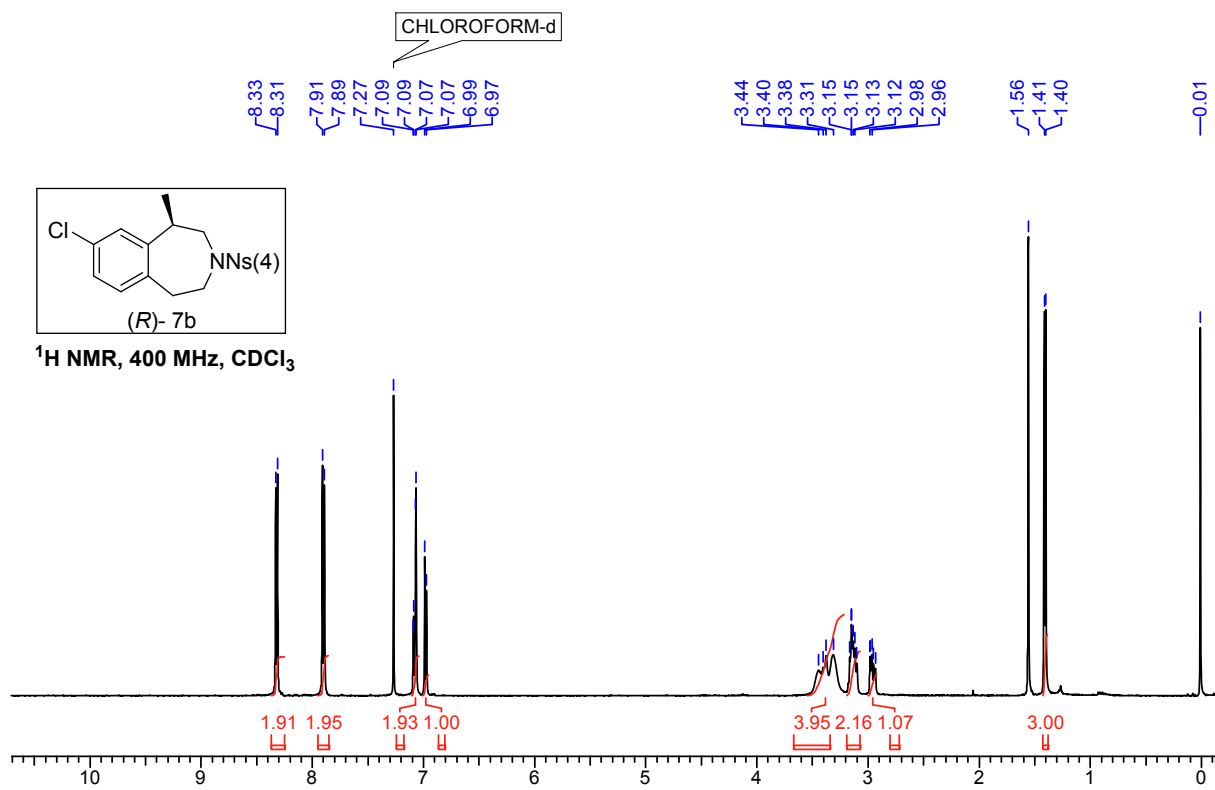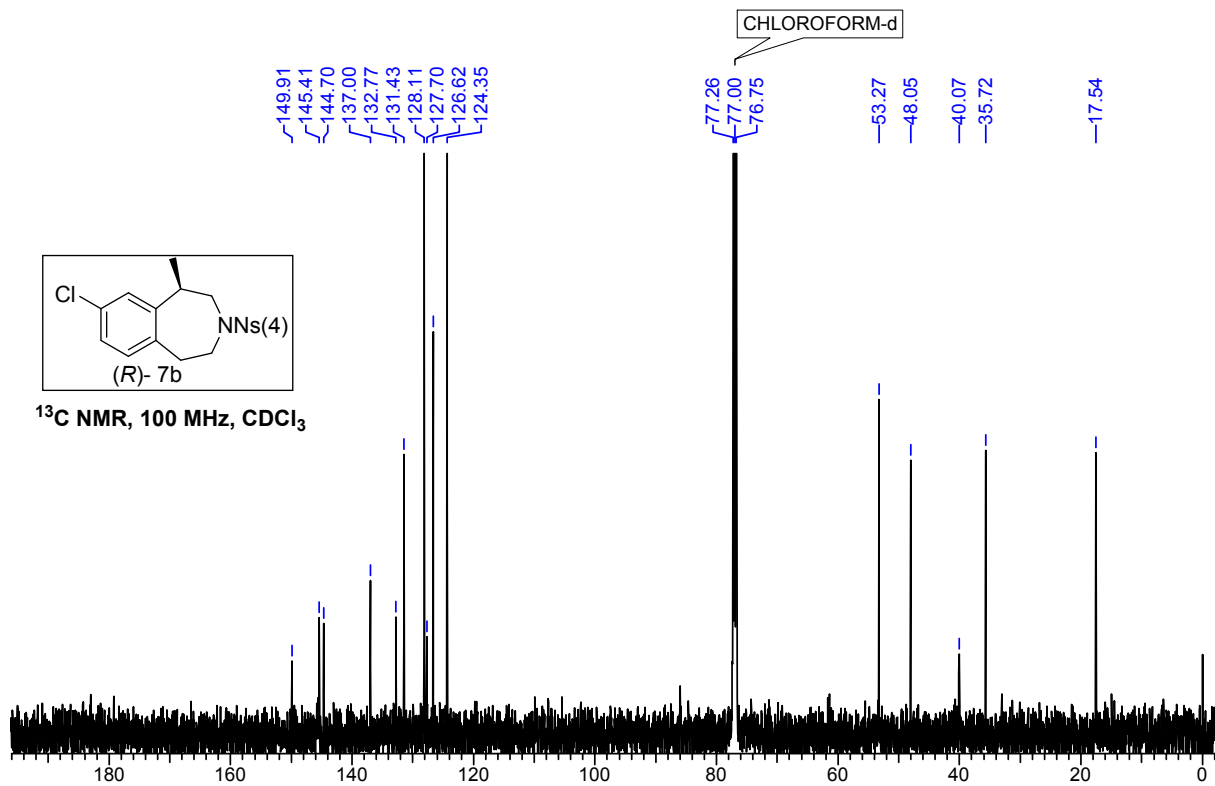

**<sup>1</sup>H NMR & <sup>13</sup>C NMR of Compound (R)-7b in CDCl<sub>3</sub>**



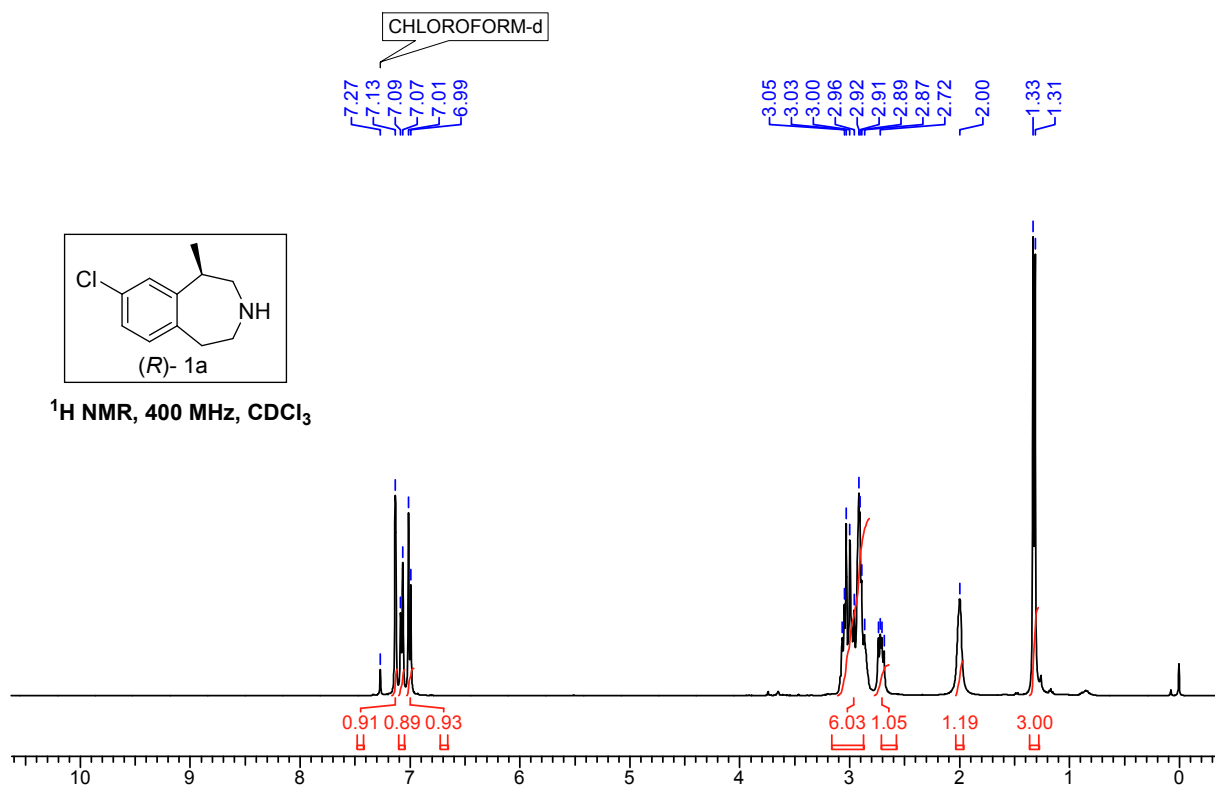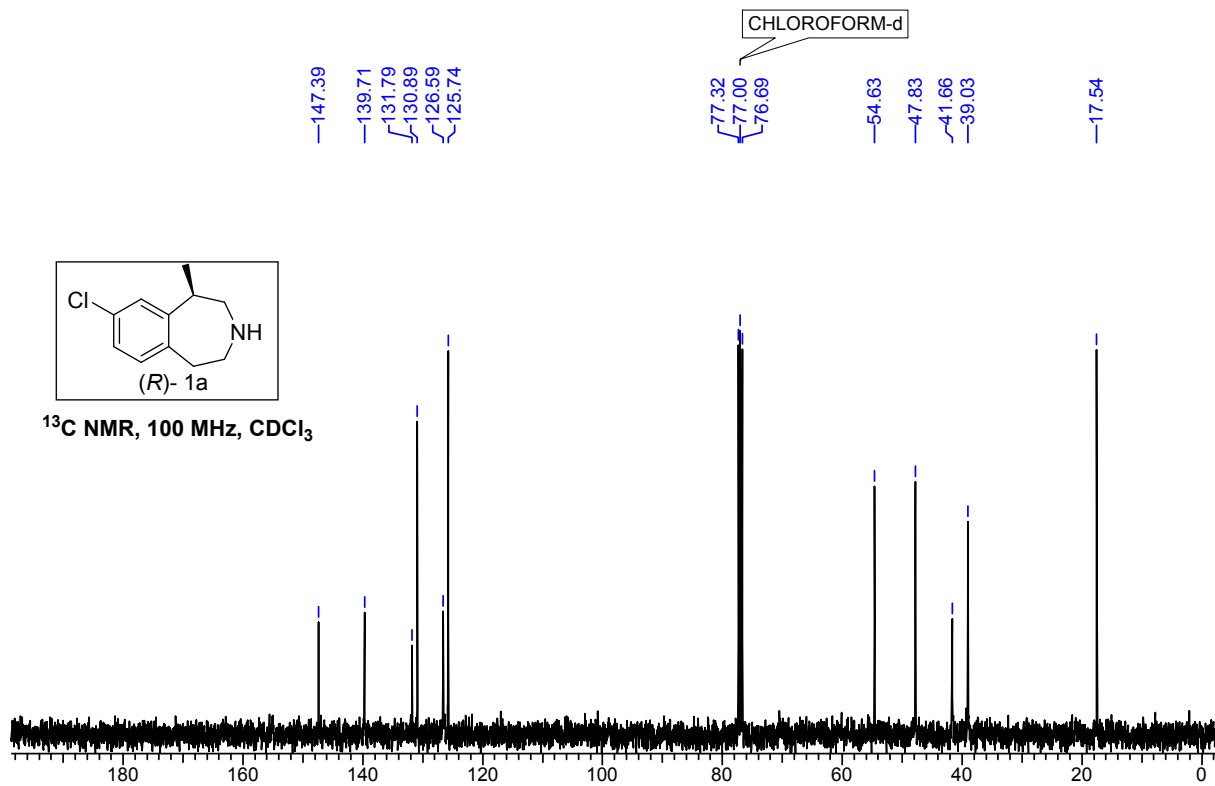

**<sup>1</sup>H NMR & <sup>13</sup>C NMR of Compound (R)-1a in CDCl<sub>3</sub>**

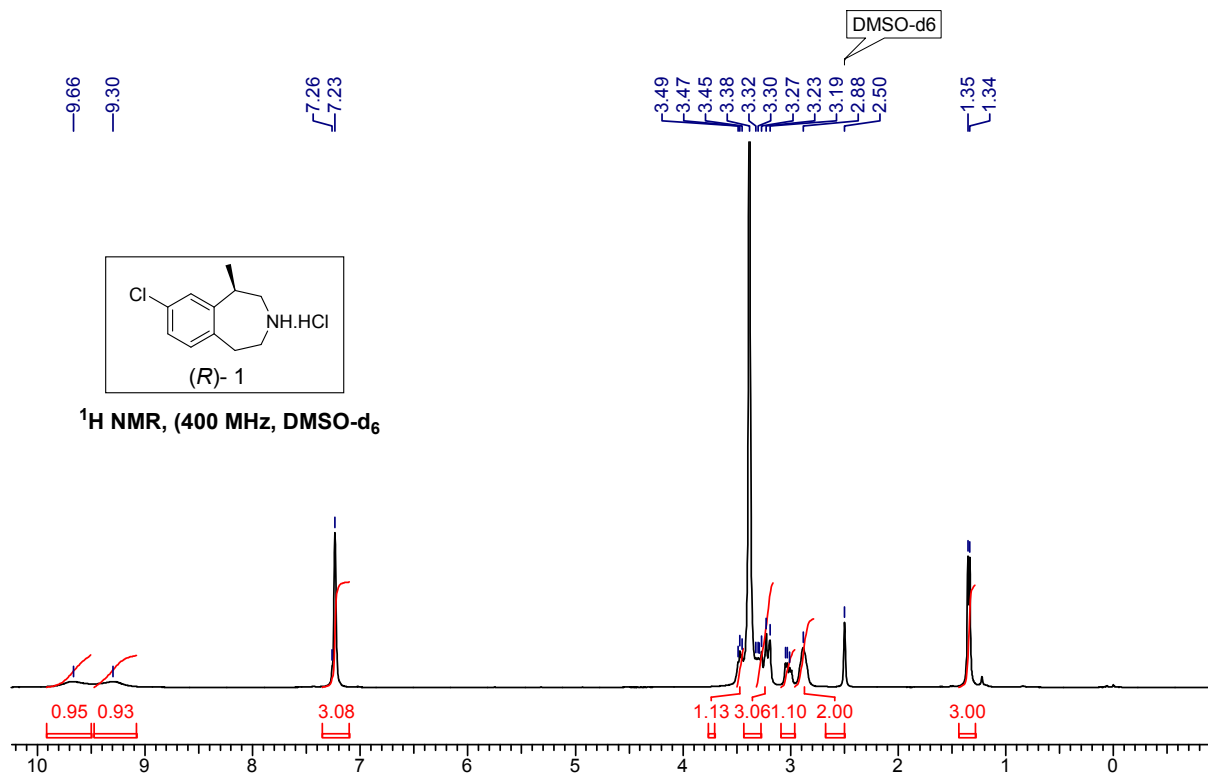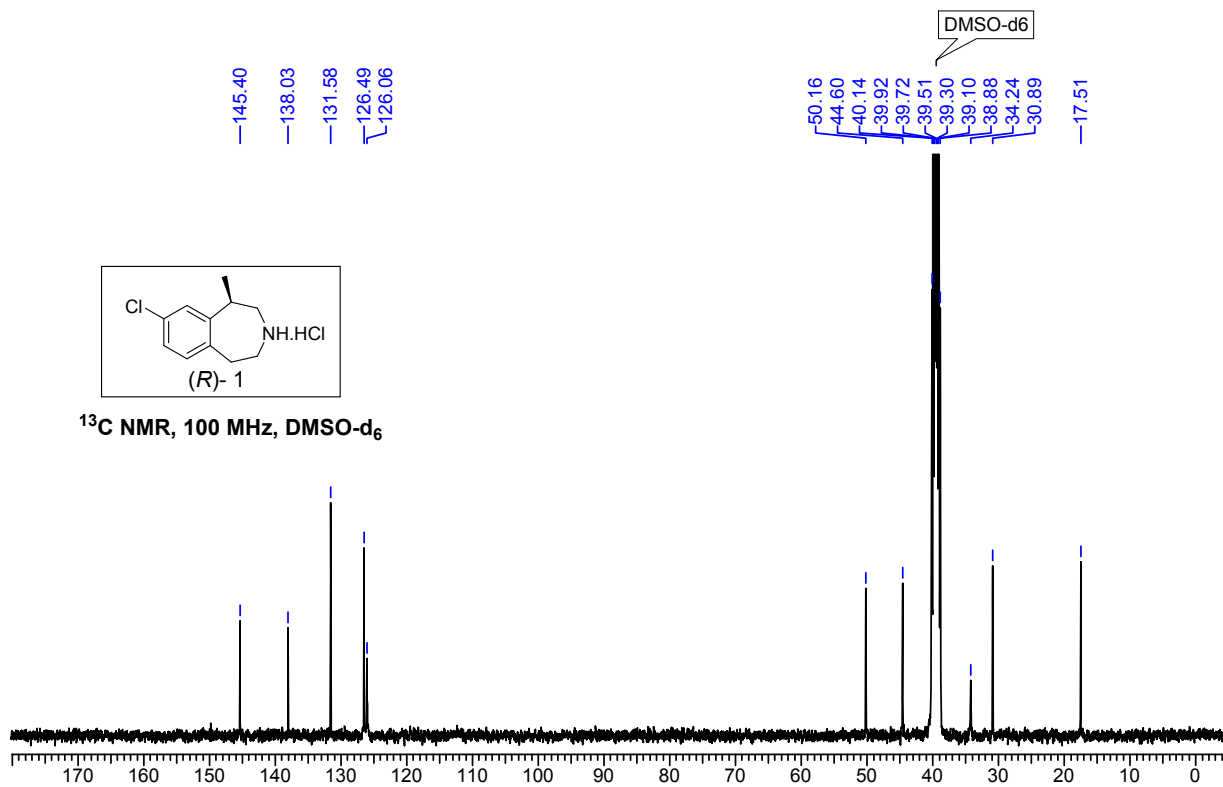

**<sup>1</sup>H NMR & <sup>13</sup>C NMR of Compound (R)-1 in DMSO-d<sub>6</sub>**

**Chiral HPLC Analysis of (R)-Lorcaserin Hydrochloride (R)-1**

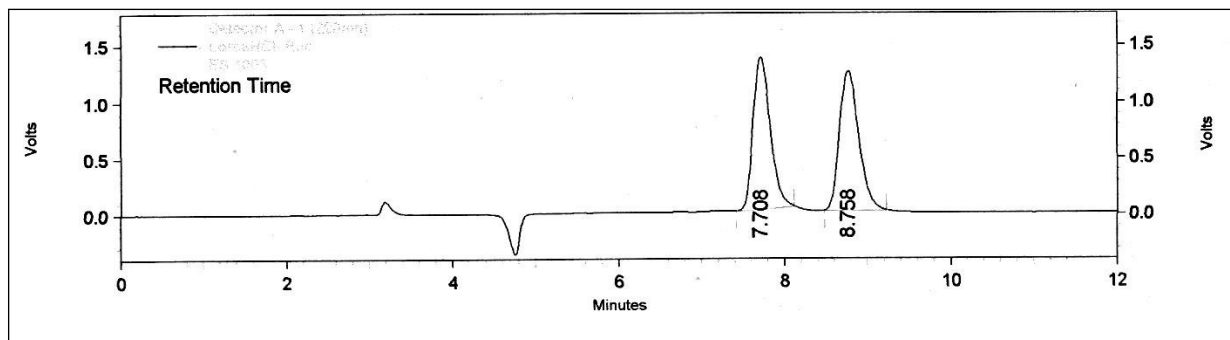

***Racemic Sample Chromatograph***

| <b>Pk #</b>   | <b>Retention Time (mins)</b> | <b>Area</b>     | <b>Area %</b>  |
|---------------|------------------------------|-----------------|----------------|
| <b>1</b>      | <b>7.708</b>                 | <b>9701740</b>  | <b>49.133</b>  |
| <b>2</b>      | <b>8.758</b>                 | <b>10044069</b> | <b>50.867</b>  |
| <b>Totals</b> |                              | <b>19745809</b> | <b>100.000</b> |

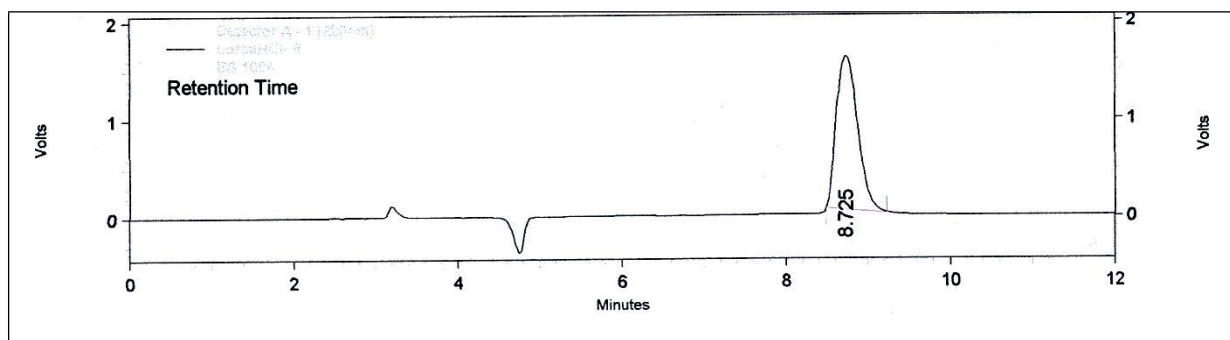

***Chiral Sample Chromatograph***

| <b>Pk #</b>   | <b>Retention Time (mins)</b> | <b>Area</b>     | <b>Area %</b>  |
|---------------|------------------------------|-----------------|----------------|
| <b>1</b>      | <b>7.708</b>                 | <b>0</b>        | <b>0</b>       |
| <b>2</b>      | <b>8.725</b>                 | <b>14114209</b> | <b>100.00</b>  |
| <b>Totals</b> |                              | <b>14114209</b> | <b>100.000</b> |
